# Supplementary material for: Understanding the Role of Tacit Knowledge in Call-Center Organizations
Source: Preprints.org preprint supplement (doi:10.20944/preprints202102.0309.v1), 2021-02-12
Supplement: Supplementary file 1 [file supplementary]

**Understanding the Role of Tacit Knowledge in Call-Center Organizations**

Samantha Okegbe1

1Department of Communication, The University of Illinois Urbana-Champaign, Illinois.

Author email: [sokegbe2@illinois.edu](mailto:sokegbe2@illinois.edu)

Author full postal address: 6805 Townbrook Dr. Apt D, Gwynn Oak, Maryland, 21207.
